# Supplementary material for: Tracking of epigenetic changes during hematopoietic differentiation of induced pluripotent stem cells
Source: PubMed Central journal article supplement (PMC6360658; doi:10.1186/s13148-019-0617-1), 2019-02-04
Supplement: 13148_2019_617_MOESM1_ESM.pdf [file 13148_2019_617_MOESM1_ESM.pdf]

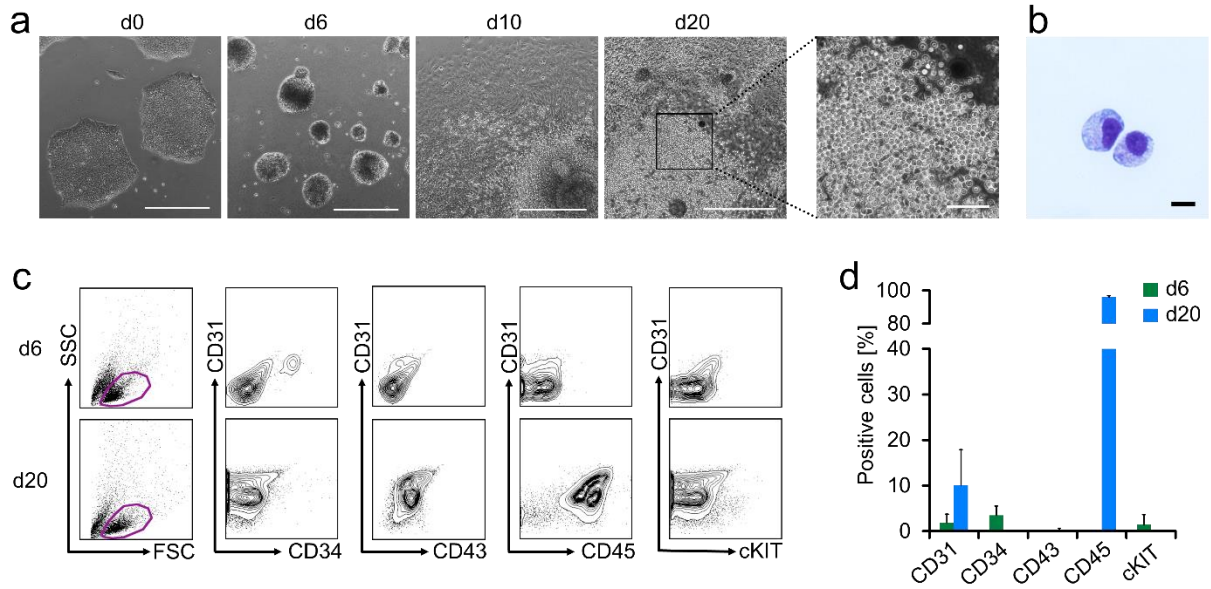

**Fig. S1: Differentiation of iPSCs toward hematopoietic progenitor cells.**

**(a)** Phase contrast images in the course of hematopoietic differentiation cultures (on days 0, 6, 10, and 20). Scale bar = 500  $\mu\text{m}$  and scale bar in inlet = 100  $\mu\text{m}$ . **(b)** Exemplary cytopsin analysis on day 22 reveals prevailing monocytic morphology. Scale bar = 10  $\mu\text{m}$ . **(c)** Flow cytometry analysis of hematopoietic differentiation cultures on days 6 and 20. Plots are representative for three independent experiments. **(d)** Frequencies of CD31, CD34, CD43, CD45, and cKIT populations on day 6 and 20 of differentiation. Data represent the mean of three independent experiments  $\pm$  SD.
