# Supplementary material for: Tracking of epigenetic changes during hematopoietic differentiation of induced pluripotent stem cells
Source: PubMed Central journal article supplement (PMC6360658; doi:10.1186/s13148-019-0617-1), 2019-02-04
Supplement: 13148_2019_617_MOESM2_ESM.pdf [file 13148_2019_617_MOESM2_ESM.pdf]

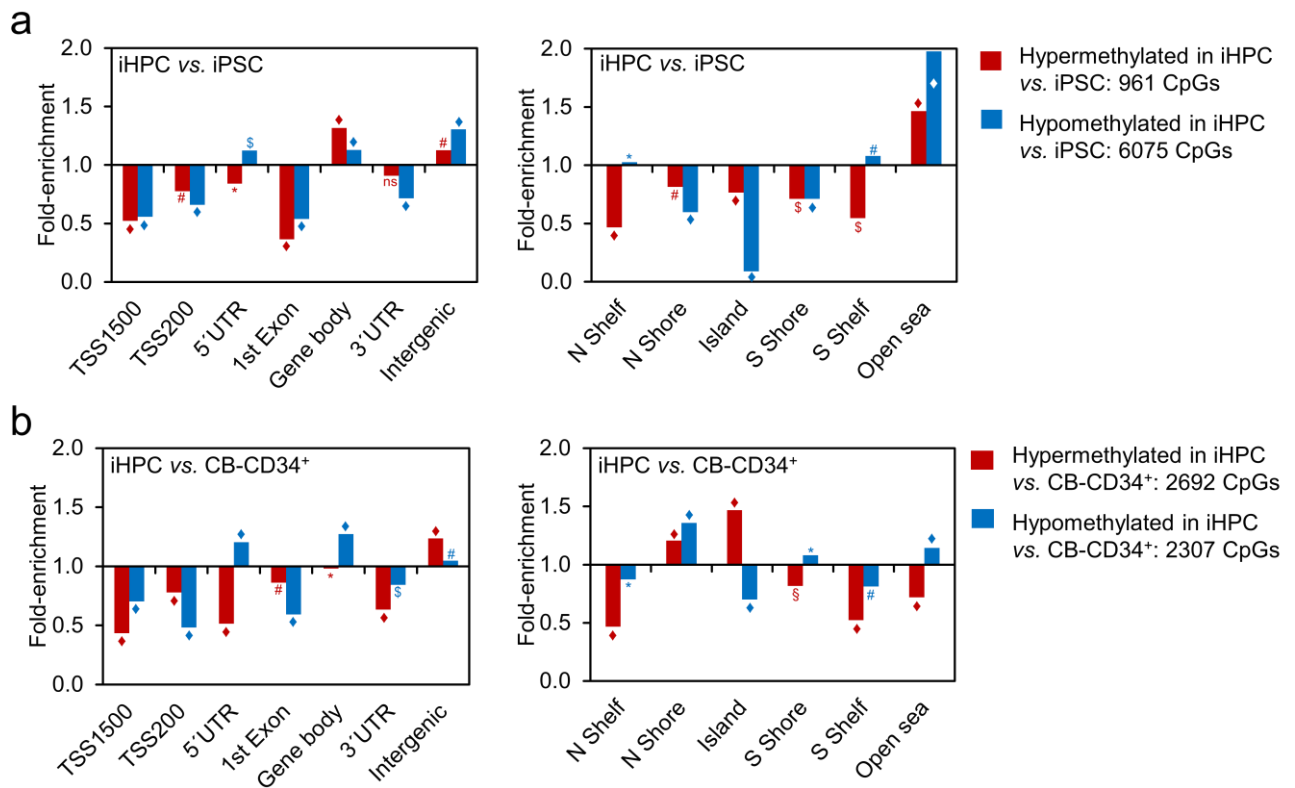

**Fig. S2: Enrichment of hyper- and hypomethylated CpG sites in iPSC-derived HPCs.**

Changes in DNA methylation ( $\Delta$  mean  $\beta$ -value  $>0.5$  or  $<-0.5$ ) in comparison **(a)** between iHPCs d20 and iPSCs (GSE37066) or **(b)** between iHPCs d20 and primary CD34<sup>+</sup> cells from human cord blood (GSE40799). The differentially methylated CpGs were classified according to gene regions and in relation to CpG islands. Hypergeometric distribution: \* =  $P < 0.05$ ; # =  $P < 0.01$ ; \$ =  $P < 0.001$ ; § =  $P < 0.0001$ ; ♦ =  $P < 0.00001$ .
