# Supplementary material for: Tracking of epigenetic changes during hematopoietic differentiation of induced pluripotent stem cells
Source: PubMed Central journal article supplement (PMC6360658; doi:10.1186/s13148-019-0617-1), 2019-02-04
Supplement: 13148_2019_617_MOESM4_ESM.pdf [file 13148_2019_617_MOESM4_ESM.pdf]

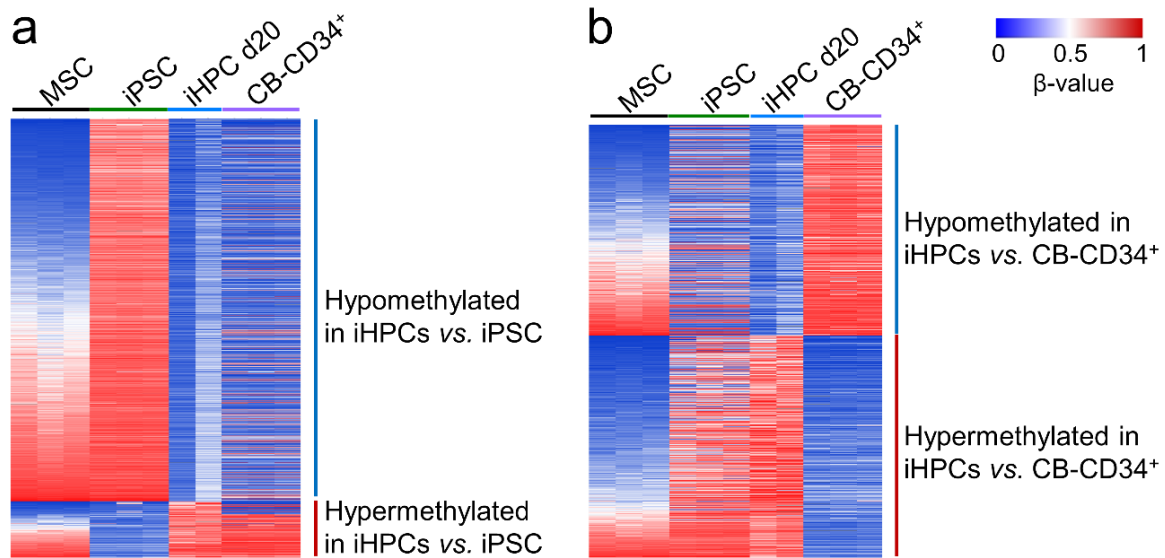

**Fig. S3: Comparison of differentially methylated CpG sites across different cell types.** Heatmap of DNAm levels at promoter associated CpG sites that are either 50 % hypo- or hypermethylated in **(a)** iHPCs *versus* iPSCs (corresponding to Figure 1C) or in **(b)** iHPCs *versus* cord blood-derived CD34<sup>+</sup> cells (corresponding to Figure 2A). DNAm levels are compared between MSCs, iPSCs, iHPCs d20, and cord blood-derived CD34<sup>+</sup> cells. The heatmaps were sorted by the mean DNAm levels in MSCs.
