# Supplementary material for: Tracking of epigenetic changes during hematopoietic differentiation of induced pluripotent stem cells
Source: PubMed Central journal article supplement (PMC6360658; doi:10.1186/s13148-019-0617-1), 2019-02-04
Supplement: 13148_2019_617_MOESM6_ESM.pdf [file 13148_2019_617_MOESM6_ESM.pdf]

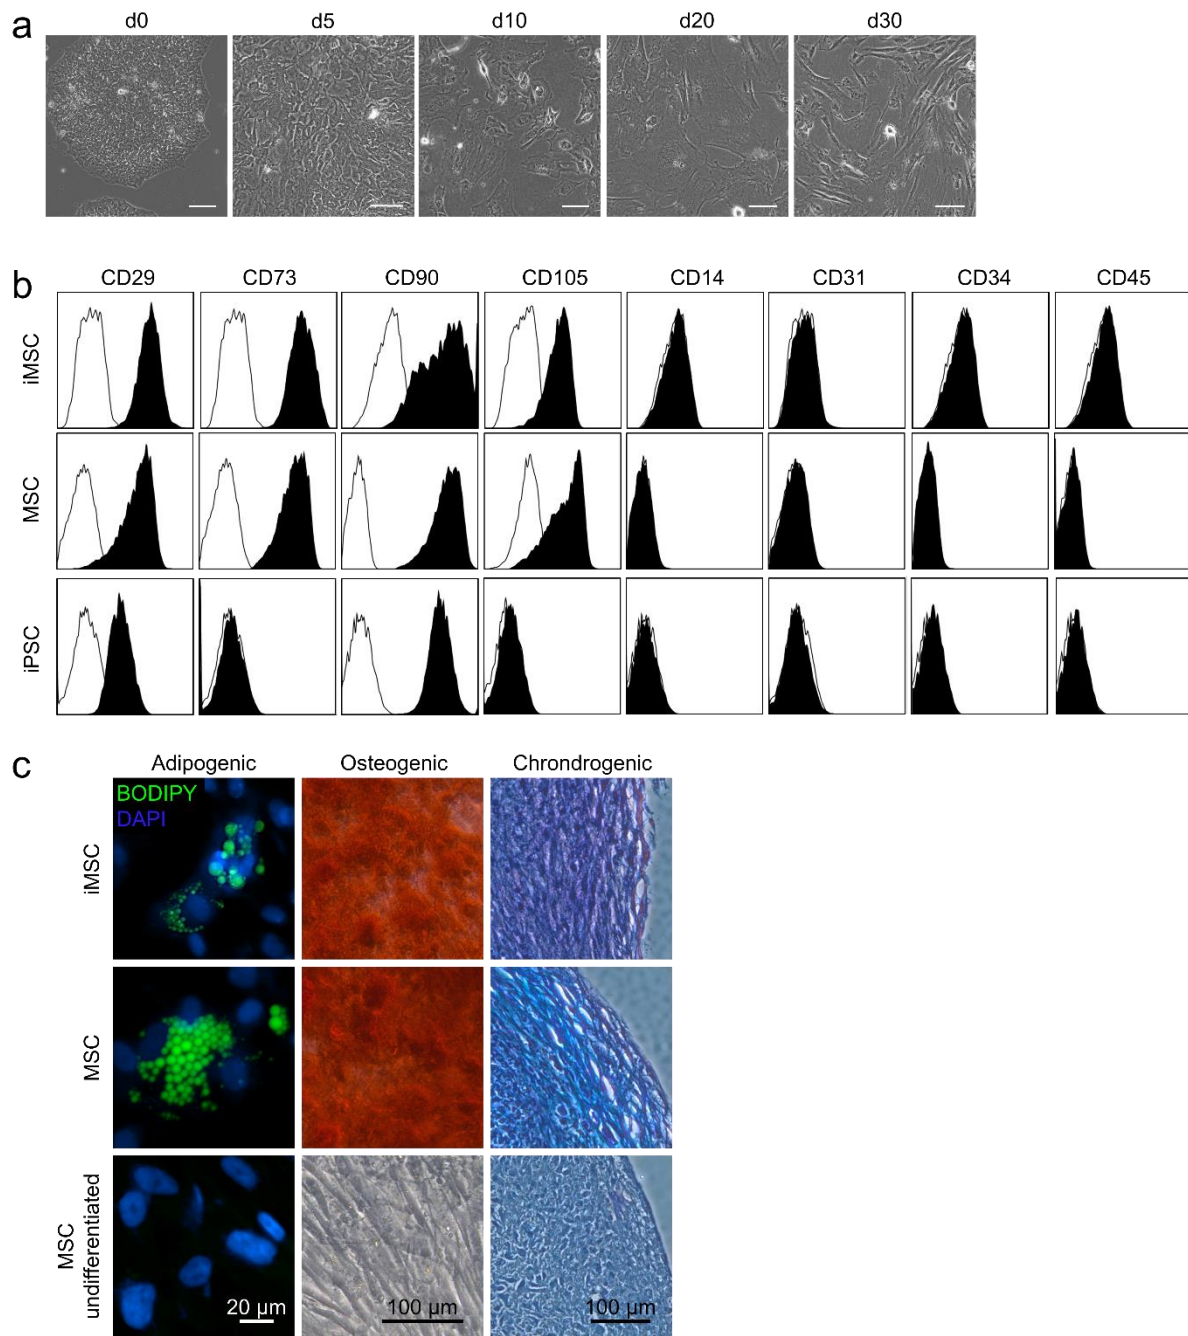

**Fig. S4: Differentiation of iPSCs toward MSCs.**

**(a)** Phase contrast images of iPSCs and in the course of differentiation toward iPSC-derived MSCs on day 5, 10, 20, and 30. Scale bar = 100  $\mu$ m. **(b)** Flow cytometric analysis of iMSCs, MSCs, and iPSCs. Data is representative of three independent experiments. Autofluorescence is indicated in white. **(c)** iMSCs can be differentiated into adipocytes (BODIPY staining of fat droplets), osteocytes (Alizarin Red staining) and chondrocytes (Alcian Blue/PAS staining).
